# Supplementary material for: The VN3H defect in diamond: a quantum-mechanical characterization
Source: Royal Society of Chemistry journal article supplement (doi:10.1039/c7cp03957c), 2017-01-01
Supplement: c7cp03957c1.pdf [file c7cp03957c1.pdf]

## The $\text{VN}_3\text{H}$ Defect in Diamond: A Quantum-Mechanical Characterization. Supplemental Material

Francesco Silvio Gentile,<sup>1</sup> Simone Salustro,<sup>1</sup> Mauro Causà,<sup>2</sup> Alessandro Erba,<sup>3</sup> Philippe Carbonnière,<sup>4</sup> and Roberto Dovesi<sup>1</sup>

<sup>1</sup>*Dipartimento di Chimica, Università di Torino and NIS - Nanostructured Interfaces and Surfaces - Centre of Excellence, Via Giuria 5, 10125 Torino, Italy*

<sup>2</sup>*Dipartimento di Ingegneria Chimica, dei Materiali e delle Produzioni Industriali,*

*Università degli studi di Napoli Federico II (Nanostructured Interfaces and Surfaces) Centre, Via P. Giuria 5, 10125 Torino, Italy*

<sup>3</sup>*Dipartimento di Chimica, Università di Torino and NIS (Nanostructured Interfaces and Surfaces) Centre, Via P. Giuria 5, 10125 Torino, Italy*

<sup>4</sup>*Equipe de Chimie Physique, IPREM UMR5254, Université de Pau et des Pays de l'Adour, 64000 Pau (France)*

### I. HOMOLYTIC FISSION OF THE C-H BOND.

Table S1: Energy required for the homolytic dehydrogenation ( $\Delta E_H$ ) of methane  $\text{CH}_4$ , ethane  $\text{C}_2\text{H}_6$ , propane  $\text{C}_3\text{H}_8$  and isobutane  $\text{C}_4\text{H}_{10}$ . The energy has been evaluated using the B3LYP functional. Indices  $t$ ,  $s$  and  $p$  characterize the carbon atom on which the radical is located: ternary, meaning that the carbon atom is linked to three other carbon atoms, secondary and primary. In the lowest part of the Table the effect of the functional is reported in the  $\text{C}_2\text{H}_6$  case. Total energies in hartree,  $\Delta E_H$  and in eV.

| R group                        | $\text{H}_2$ | R·          | R-H        | $\Delta E_H$ |
|--------------------------------|--------------|-------------|------------|--------------|
| H·                             | -1.16872     | -4.968621   | -          | +2.381       |
| $\text{CH}_3\cdot$             | -1.16872     | -39.766981  | -40.44889  | +2.655       |
| $\text{C}_2\text{H}_5\cdot(p)$ | -1.16872     | -79.023618  | -79.69719  | +2.428       |
| $\text{C}_3\text{H}_7\cdot(p)$ | -1.16872     | -118.273995 | -118.94782 | +2.434       |
| $\text{C}_4\text{H}_9\cdot(p)$ | -1.16872     | -157.52555  | -158.19980 | +2.447       |
| $\text{C}_3\text{H}_7\cdot(s)$ | -1.16872     | -118.281550 | -118.94782 | +2.229       |
| $\text{C}_4\text{H}_9\cdot(t)$ | -1.16872     | -157.53977  | -158.19980 | +2.060       |

  

| Method | $\text{H}_2$ | $\text{C}_2\text{H}_5\cdot$ | $\text{C}_2\text{H}_6$ | $\Delta E_H$ |
|--------|--------------|-----------------------------|------------------------|--------------|
| B3LYP  | -1.16872     | -79.023618                  | -79.69719              | -2.428       |
| PBE0   | -1.16389     | -78.979524                  | -79.65307              | -2.493       |
| HSE06  | -1.16357     | -78.977171                  | -79.65050              | -2.491       |
| PBE    | -1.16198     | -78.959341                  | -79.63236              | -2.504       |
| LDA    | -1.13325     | -78.289382                  | -78.96125              | -2.864       |
